# Supplementary material for: Accumulation of dysfunctional tumor-infiltrating PD-1+ DCs links PD-1/PD-L1 blockade immunotherapeutic response in cervical cancer
Source: PubMed Central journal article supplement — Oncoimmunology. 2022 Feb 9;11(1):2034257. doi: 10.1080/2162402X.2022.2034257 (PMC8837238; doi:10.1080/2162402x.2022.2034257), 2022-02-09
Supplement: KONI_A_2034257_SM7630.pdf [file KONI_A_2034257_SM7630.pdf]

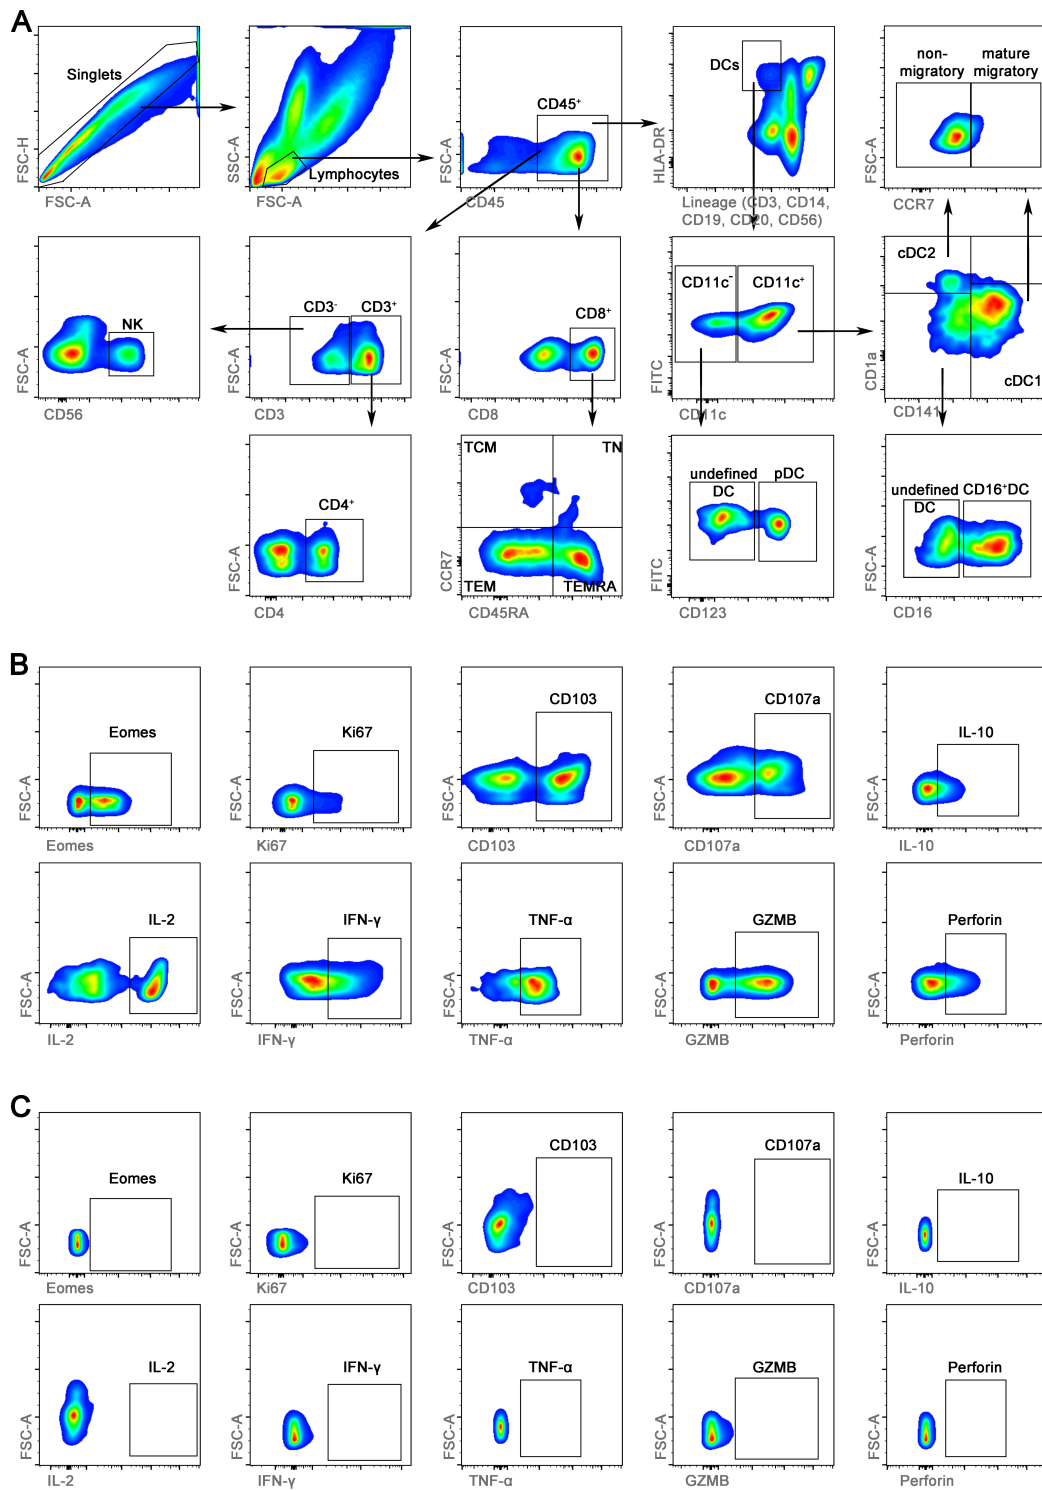

Supplementary Figure 1. Gating strategy

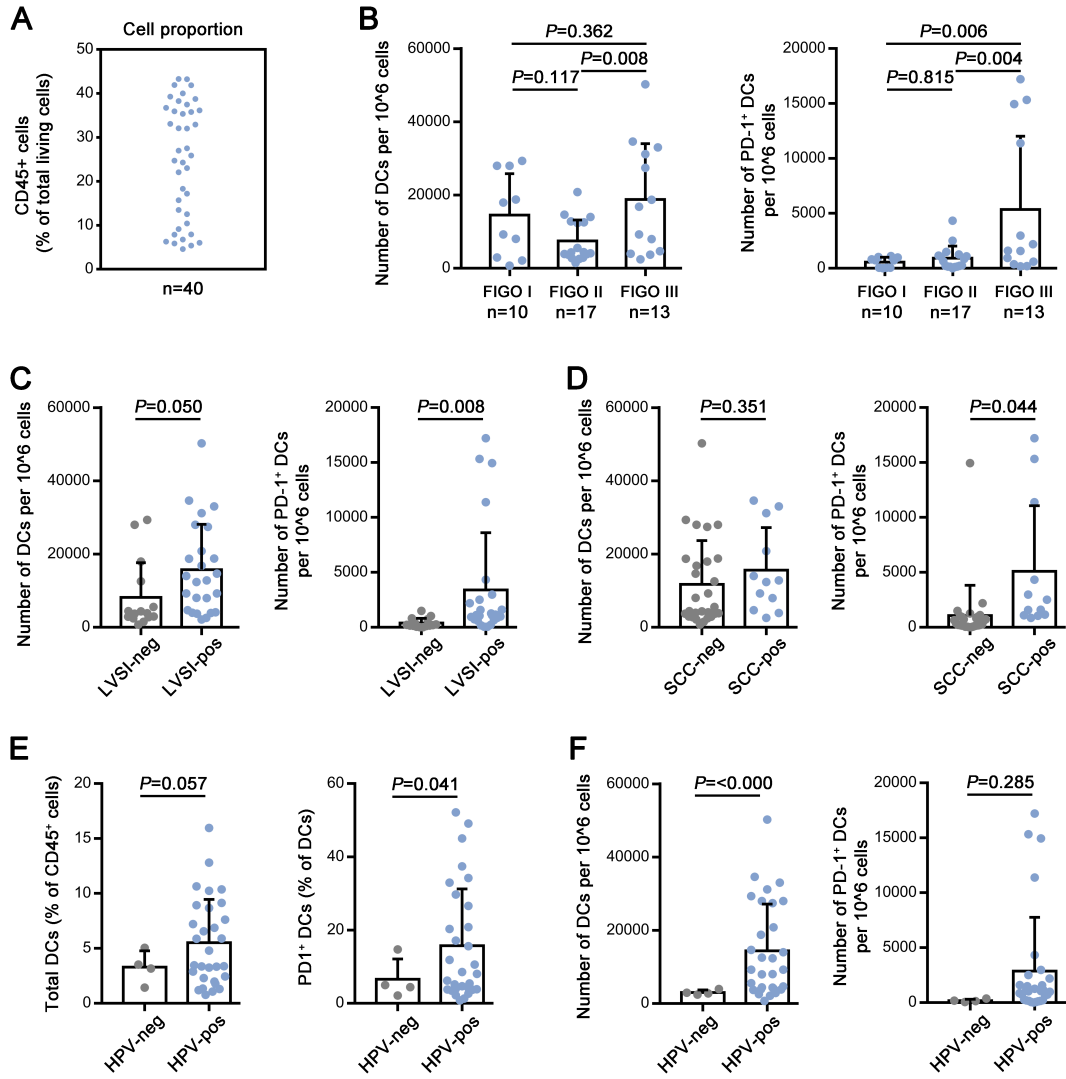

Supplementary Figure 2. Identification of enriched intratumoral PD-1+ DCs in advanced CC

Supplementary Table 1. Antibodies for flow cytometry analysis

| Source      | Identifier | Antibody                                                  |
|-------------|------------|-----------------------------------------------------------|
| BD          | 563449     | human anti-CCR7                                           |
| Biologend   | 350213     | human anti-CD103                                          |
| Biologend   | 328619     | human anti-CD107a                                         |
| Biologend   | 301636     | human anti-CD11c                                          |
| Biologend   | 306018     | human anti-CD123                                          |
| Biologend   | 344106     | human anti-CD141                                          |
| Biologend   | 302016     | human anti-CD16                                           |
| Biologend   | 331506     | human anti-CD1c                                           |
| Biologend   | 300305     | human anti-CD3                                            |
| BD          | 562970     | human anti-CD4                                            |
| Biologend   | 334332     | human anti-CD40                                           |
| Biologend   | 304062     | human anti-CD45                                           |
| Biologend   | 304125     | human anti-CD45RA                                         |
| Biologend   | 362537     | human anti-CD56                                           |
| Biologend   | 344704     | human anti-CD8                                            |
| Biologend   | 305220     | human anti-CD80                                           |
| Biologend   | 305406     | human anti-CD86                                           |
| Biologend   | 338406     | human anti-CD96                                           |
| Biologend   | 519503     | human anti-CXCL10                                         |
| Biologend   | 357905     | human anti-CXCL9                                          |
| ebioscience | 50487741   | human anti-eomes                                          |
| Biologend   | 372219     | human anti-GZMB                                           |
| Biologend   | 307630     | human anti-HLA-DR                                         |
| Biologend   | 502541     | human anti-IFNG                                           |
| biologend   | 501409     | human anti-IL-10                                          |
| BD          | 559325     | human anti-IL-12                                          |
| ebioscience | 12701841   | human anti-IL-1 $\beta$                                   |
| Biologend   | 500327     | human anti-IL-2                                           |
| Biologend   | 350519     | human anti-Ki67                                           |
| Biologend   | 348701     | human anti-Lineage Cocktail (CD3, CD14, CD19, CD20, CD56) |
| BD          | 562516     | human anti-PD-1                                           |
| biologend   | 329929     | human anti-PD-1                                           |
| Biologend   | 329708     | human anti-PD-L1                                          |
| Biologend   | 329616     | human anti-PD-L2                                          |
| Biologend   | 308125     | human anti-perforin                                       |
| Biologend   | 308105     | human anti-perforin                                       |
| Biologend   | 345006     | human anti-Tim-3                                          |
| Biologend   | 502929     | human anti-TNF $\alpha$                                   |
| Biologend   | 117317     | mouse anti-CD11c                                          |
| Biologend   | 124607     | mouse anti-CD40                                           |
| Biologend   | 104707     | mouse anti-CD80                                           |
| Biologend   | 105019     | mouse anti-CD86                                           |
| Biologend   | 505807     | mouse anti-IFN-r                                          |
| BD          | 560564     | mouse anti-IL-12                                          |
| Biologend   | 107625     | mouse anti-MHCII                                          |
| Biologend   | 135221     | mouse anti-PD-1(CD279)                                    |
| Biologend   | 135209     | mouse anti-PD-1(CD279)                                    |
| Biologend   | 506307     | mouse anti-TNF $\alpha$                                   |
| Biologend   | 400169     | mouse IgG1, $\kappa$ isotype Ctrl                         |

Supplementary Table 2. Association of clinical and pathological parameters with DCs infiltration

| Characteristics                     | Patients |       |
|-------------------------------------|----------|-------|
|                                     | No.      | %     |
| <b>Total</b>                        | 40       | 100.0 |
| <b>Clinical stage</b>               |          |       |
| I                                   | 10       | 25.0  |
| II                                  | 17       | 42.5  |
| III                                 | 13       | 32.5  |
| <b>HPV infection</b>                |          |       |
| no                                  | 4        | 10.0  |
| yes                                 | 30       | 75.0  |
| N/a                                 | 6        | 15.0  |
| <b>Histology</b>                    |          |       |
| SCC <sup>A</sup>                    | 32       | 80.0  |
| AC <sup>B</sup>                     | 4        | 10.0  |
| ASC <sup>C</sup>                    | 4        | 10.0  |
| <b>Tumor size</b>                   |          |       |
| <4 cm                               | 12       | 30.0  |
| ≥4cm                                | 28       | 70.0  |
| <b>Deep stromal invasion</b>        |          |       |
| no                                  | 15       | 37.5  |
| yes                                 | 35       | 87.5  |
| <b>Lymphovascular invasion</b>      |          | 0.0   |
| no                                  | 15       | 37.5  |
| yes                                 | 25       | 62.5  |
| <b>Parametrial invasion</b>         |          |       |
| no                                  | 31       | 77.5  |
| yes                                 | 9        | 22.5  |
| <b>Vaginal invasion</b>             |          |       |
| no                                  | 25       | 62.5  |
| yes                                 | 15       | 37.5  |
| <b>Pelvic lymph node metastasis</b> |          |       |
| no                                  | 27       | 67.5  |
| yes                                 | 13       | 32.5  |
| <b>SCC level<sup>D</sup></b>        |          |       |
| normal                              | 28       | 70.0  |
| high                                | 12       | 30.0  |

<sup>A</sup>squamous cell carcinoma, <sup>B</sup>adenocarcinoma, <sup>C</sup>adenosquamous carcinoma

<sup>D</sup>serum SCC level below 5ng/ml is considered normal
